# Supplementary material for: Assessing the Relationship between the Gut Microbiota and Inflammatory Bowel Disease Therapeutics: A Systematic Review
Source: MDPI journal article supplement (doi:10.3390/pathogens12020262), 2023-02-06
Supplement: s1 [file s1]

**Supplementary Table S1.** Newcastle-Ottawa Scale—Summary of Newcastle-Ottawa Scale of each included cohort study.

| Study                        | Selection                                |                                     |                           |                                                                          | Comparability                                                                              | Outcome               |                                                 |                                  | Total quality score |
|------------------------------|------------------------------------------|-------------------------------------|---------------------------|--------------------------------------------------------------------------|--------------------------------------------------------------------------------------------|-----------------------|-------------------------------------------------|----------------------------------|---------------------|
|                              | Representativeness of the exposed cohort | Selection of the non-exposed cohort | Ascertainment of exposure | Demonstration that outcome of interest was not present at start of study | Comparability of cohorts on the basis of the design or analysis controlled for confounders | Assessment of outcome | Was follow-up long enough for outcomes to occur | Adequacy of follow-up of cohorts |                     |
| Zhou et al. [57]             | 1                                        | 1                                   | 1                         | 1                                                                        | 2                                                                                          | 1                     | 1                                               | 1                                | 9                   |
| Kowalska-Duplaga et al. [54] | 0                                        | 1                                   | 1                         | 1                                                                        | 2                                                                                          | 1                     | 1                                               | 1                                | 8                   |
| Ribaldone et al. [53]        | 1                                        | 1                                   | 0                         | 1                                                                        | 2                                                                                          | 1                     | 1                                               | 1                                | 8                   |
| Kolho et al. [43]            | 1                                        | 1                                   | 1                         | 1                                                                        | 2                                                                                          | 1                     | 1                                               | 0                                | 8                   |
| Ananthakrishnan et al. [42]  | 1                                        | 1                                   | 1                         | 1                                                                        | 1                                                                                          | 1                     | 1                                               | 1                                | 8                   |
| Wang et al. [39]             | 1                                        | 1                                   | 1                         | 1                                                                        | 2                                                                                          | 1                     | 1                                               | 1                                | 9                   |
| Wang et al. [38]             | 1                                        | 1                                   | 1                         | 1                                                                        | 2                                                                                          | 1                     | 1                                               | 1                                | 9                   |
| Aden et al. [58]             | 1                                        | 1                                   | 1                         | 1                                                                        | 1                                                                                          | 1                     | 1                                               | 1                                | 8                   |
| Zhuang et al. [40]           | 1                                        | 1                                   | 1                         | 1                                                                        | 2                                                                                          | 1                     | 1                                               | 1                                | 9                   |
| Ding et al. [48]             | 0                                        | 1                                   | 0                         | 1                                                                        | 2                                                                                          | 1                     | 1                                               | 1                                | 7                   |
| Dovrolis et al. [59]         | 0                                        | 1                                   | 1                         | 1                                                                        | 2                                                                                          | 1                     | 1                                               | 1                                | 8                   |
| Olbjorn et al. [50]          | 1                                        | 1                                   | 1                         | 0                                                                        | 0*                                                                                         | 1                     | 1                                               | 1                                | 6                   |
| Salamon et al. [55]          | 1                                        | 1                                   | 1                         | 1                                                                        | 2                                                                                          | 1                     | 1                                               | 1                                | 9                   |
| Hart et al. [35]             | 1                                        | 1                                   | 1                         | 1                                                                        | 2                                                                                          | 1                     | 1                                               | 1                                | 9                   |
| Ishikawa et al. [37]         | 0                                        | 1                                   | 1                         | 0                                                                        | 2                                                                                          | 1                     | 1                                               | 1                                | 7                   |
| Kaakoush et al. [64]         | 1                                        | 1                                   | 1                         | 1                                                                        | 2                                                                                          | 1                     | 1                                               | 1                                | 9                   |
| Quince et al. [65]           | 1                                        | 1                                   | 1                         | 1                                                                        | 2                                                                                          | 1                     | 1                                               | 1                                | 9                   |

|                             |   |   |   |   |    |   |   |   |   |
|-----------------------------|---|---|---|---|----|---|---|---|---|
| Tang et al. [66]            | 1 | 1 | 1 | 1 | 1  | 1 | 1 | 1 | 8 |
| Dunn et al. [67]            | 1 | 1 | 1 | 1 | 2  | 1 | 1 | 1 | 9 |
| Costa-Santos et al. [68]    | 1 | 1 | 1 | 1 | 2  | 1 | 1 | 1 | 9 |
| Diederen et al. [69]        | 1 | 1 | 1 | 1 | 1  | 1 | 1 | 1 | 8 |
| Valcheva et al. [51]        | 1 | 0 | 1 | 1 | 0* | 1 | 1 | 1 | 6 |
| Suskind et al. [52]         | 1 | 0 | 1 | 1 | 0* | 1 | 1 | 1 | 6 |
| Ventin-Holmberg et al. [56] | 1 | 0 | 1 | 1 | 2  | 1 | 1 | 1 | 8 |
| Schierova et al. [60]       | 1 | 1 | 1 | 1 | 2  | 1 | 1 | 1 | 9 |
| Sanchis-Artero et al. [61]  | 1 | 0 | 1 | 1 | 1  | 1 | 1 | 1 | 7 |
| Park et al. [63]            | 1 | 1 | 1 | 1 | 2  | 1 | 1 | 1 | 9 |
| Ventin-Holmberg et al. [49] | 1 | 0 | 1 | 1 | 2  | 1 | 1 | 1 | 8 |
| Effenberger et al. [62]     | 1 | 1 | 1 | 1 | 2  | 1 | 1 | 1 | 9 |
| Wilson et al. [72]          | 1 | 0 | 1 | 1 | 2  | 1 | 1 | 1 | 9 |
| Olendzki et al. [74]        | 1 | 1 | 1 | 1 | 2  | 1 | 1 | 1 | 9 |
| Tang et al. [66]            | 1 | 1 | 1 | 1 | 2  | 1 | 1 | 1 | 9 |
| Jiang et al. [70]           | 1 | 0 | 0 | 1 | 2  | 1 | 1 | 1 | 7 |
| Chen et al. [73]            | 1 | 1 | 1 | 1 | 1  | 1 | 1 | 1 | 8 |

Note: \*No study controls or exclusion criteria involving IBD patients were stated in Olbjorn et al.'s or Suskind or Valcheva manuscripts.

**Supplementary Table S2.** Summary of Newcastle-Ottawa Scale of each included RCT.

| Study                 | Selection                        |                                 |                       |                        | Comparability                                                              | Exposure                  |                                                     |                   | Total quality score |
|-----------------------|----------------------------------|---------------------------------|-----------------------|------------------------|----------------------------------------------------------------------------|---------------------------|-----------------------------------------------------|-------------------|---------------------|
|                       | Is the case definition adequate? | Representativeness of the cases | Selection of Controls | Definition of Controls | Comparability of cases and controls on the basis of the design or analysis | Ascertainment of exposure | Same method of ascertainment for cases and controls | Non-Response rate |                     |
| Doherty et al. [41]   | 1                                | 1                               | 1                     | 1                      | 2                                                                          | 1                         | 1                                                   | 1                 | 9                   |
| Sprockett et al. [36] | 1                                | 1                               | 1                     | 1                      | 2                                                                          | 1                         | 1                                                   | 1                 | 9                   |
| Pigneur et al. [34]   | 1                                | 0                               | 0                     | 1                      | 2                                                                          | 0                         | 1                                                   | 1                 | 6                   |
| Schierova et al. [33] | 1                                | 1                               | 0                     | 1                      | 2                                                                          | 0                         | 1                                                   | 1                 | 7                   |
| Suskind et al. [71]   | 1                                | 1                               | 1                     | 0                      | 1                                                                          | 1                         | 1                                                   | 1                 | 7                   |
